# Supplementary material for: Two-step route to size and shape controlled gibbsite nanoplates and the crystal growth mechanism
Source: Royal Society of Chemistry journal article supplement (doi:10.1039/d0ce00114g), 2020-01-01
Supplement: d0ce00114g1.pdf [file d0ce00114g1.pdf]

## **Supporting Information**

### **Two-Step Route to Size and Shape Controlled Gibbsite Nanoplates and the Crystal Growth Mechanism**

*Suyun Wang<sup>†, ‡</sup>, Xin Zhang<sup>\*†</sup>, Trent R. Graham<sup>†</sup>, Hailin Zhang<sup>†</sup>, Carolyn I. Pearce<sup>§</sup>, Zheming Wang<sup>†</sup>, Sue B. Clark<sup>§, †</sup>, Wei Jiang<sup>\*‡</sup> and Kevin M. Rosso<sup>\*†</sup>*

<sup>†</sup> Physical & Computational Sciences Directorate, Pacific Northwest National Laboratory,  
Richland, Washington 99354, USA

<sup>‡</sup> School of Chemical Engineering, Nanjing University of Science and Technology, Nanjing  
210094, China

<sup>§</sup> Energy & Environment Directorate, Pacific Northwest National Laboratory, Richland, WA,  
USA

<sup>†</sup> The Voiland School of Chemical and Biological Engineering, Washington State University,  
Pullman, Washington, USA

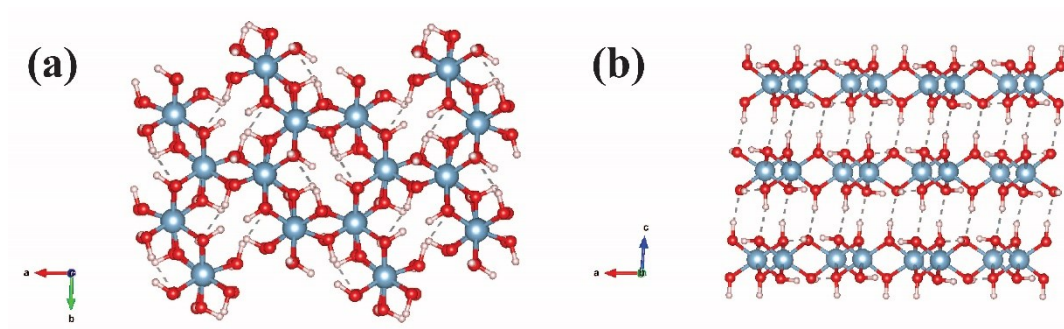

**Figure S1.** The crystal structure of gibbsite (a) along [001] direction and (b) along [100] direction.

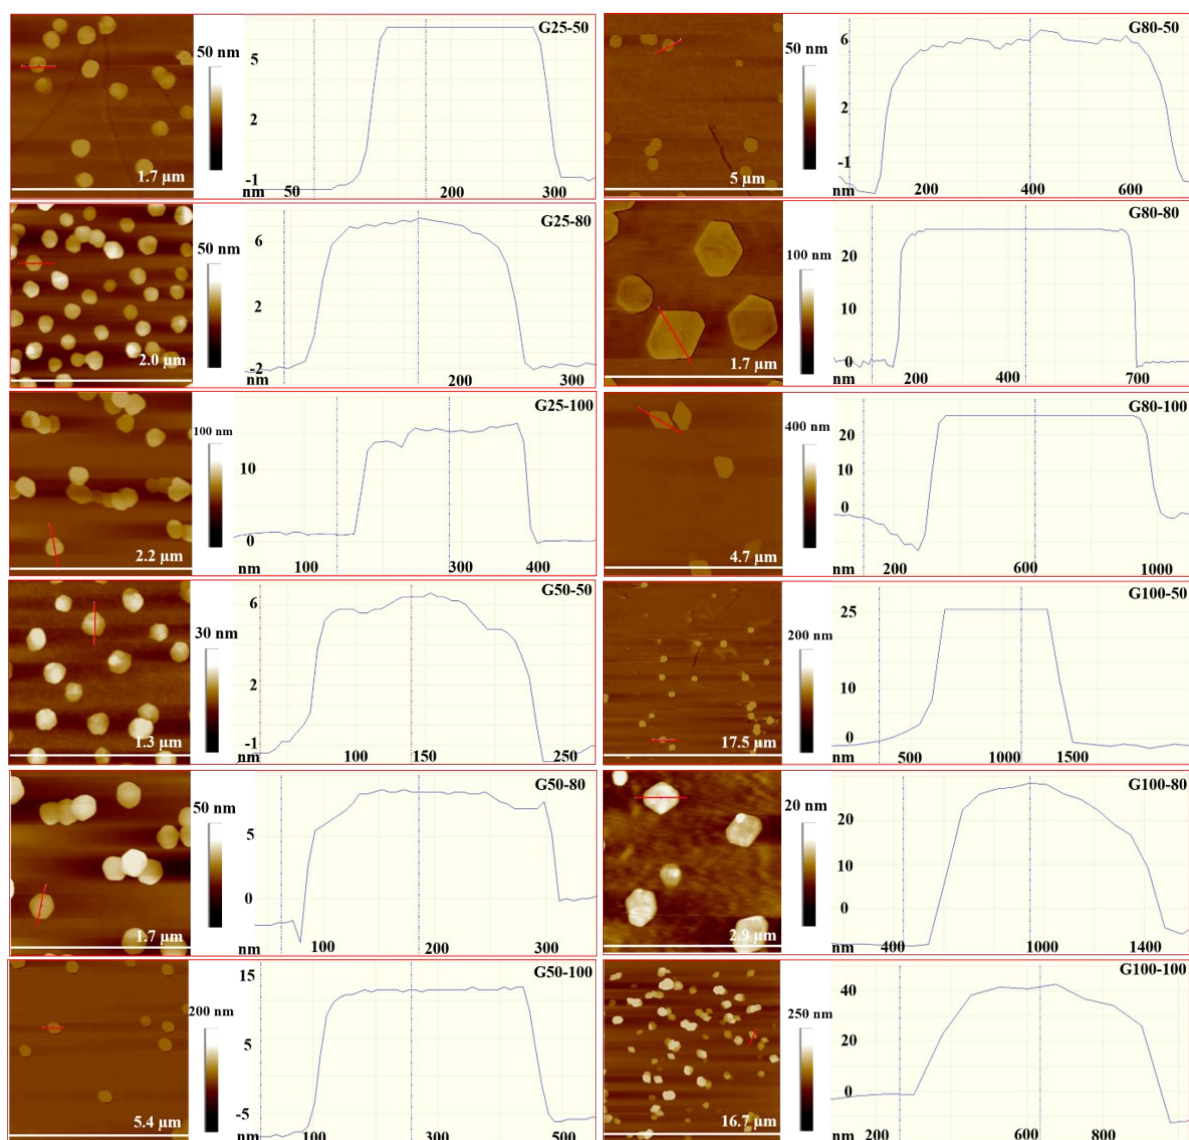

**Figure S2.** Topographic AFM image and corresponding cross-section for the as-prepared gibbsite nanoplates.

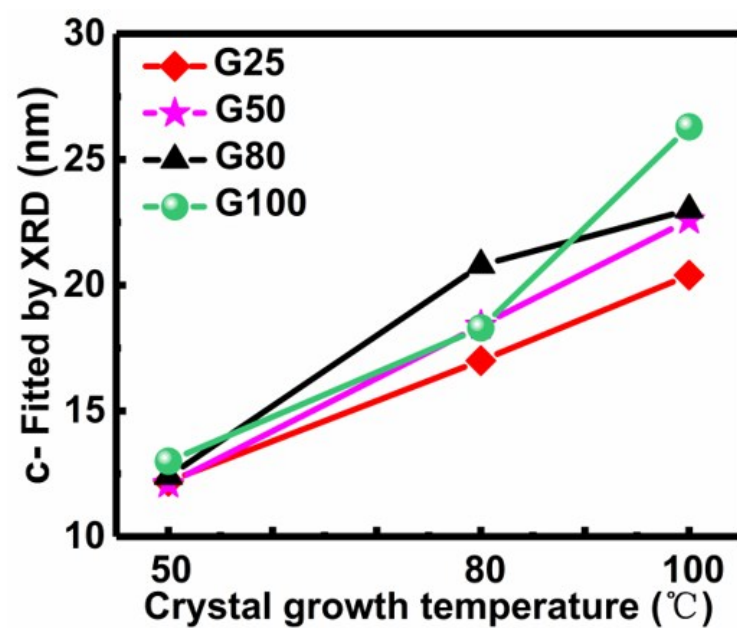

**Figure S3.** Thickness of as-prepared gibbsite samples determined by XRD fitting.
